# Supplementary material for: The Implicitome: A Resource for Rationalizing Gene-Disease Associations
Source: PLoS One. 2016 Feb 26;11(2):e0149621. doi: 10.1371/journal.pone.0149621 (PMC4769089; doi:10.1371/journal.pone.0149621)
Supplement: S1 Table — Histogram of the complete range of match scores for both implicit and explicit associations. (XLSX) [file pone.0149621.s001.xlsx]

## Sheet: matchscores and distribution
percentile	logMatchScore	#implicit	#explicit	#implCumulative	#explCumulative	logMatchScore	log#implC	log#explC	%implicit
100	0.5	0	3	0	3	0.5	#NUM!	0.477121	0
100	0.4	0	7	0	10	0.4	#NUM!	1	0
100	0.3	0	23	0	33	0.3	#NUM!	1.51851	0
100	0.2	0	37	0	70	0.2	#NUM!	1.8451	0
100	0.1	0	48	0	118	0.1	#NUM!	2.07188	0
100	0	0	63	0	181	0	#NUM!	2.25768	0
100	-0.1	0	71	0	252	-0.1	#NUM!	2.4014	0
100	-0.2	0	123	0	375	-0.2	#NUM!	2.57403	0
100	-0.3	0	188	0	563	-0.3	#NUM!	2.75051	0
100	-0.4	0	303	0	866	-0.4	#NUM!	2.93752	0
99.999	-0.5	0	330	0	1196	-0.5	#NUM!	3.07773	0
99.999	-0.6	0	377	0	1573	-0.6	#NUM!	3.19673	0
99.999	-0.7	0	554	0	2127	-0.7	#NUM!	3.32777	0
99.999	-0.8	0	698	0	2825	-0.8	#NUM!	3.45102	0
99.998	-0.9	0	861	0	3686	-0.9	#NUM!	3.56656	0
99.998	-1	1	1147	1	4833	-1	0	3.68422	0
99.997	-1.1	7	1415	8	6248	-1.1	0.90309	3.79574	0.001
99.996	-1.2	16	1853	24	8101	-1.2	1.38021	3.90854	0.003
99.995	-1.3	28	2547	52	10648	-1.3	1.716	4.02727	0.005
99.993	-1.4	37	3192	89	13840	-1.4	1.94939	4.14114	0.006
99.991	-1.5	42	4306	131	18146	-1.5	2.11727	4.25878	0.007
99.988	-1.6	125	5871	256	24017	-1.6	2.40824	4.38052	0.011
99.984	-1.7	207	7911	463	31928	-1.7	2.66558	4.50417	0.014
99.979	-1.8	278	10419	741	42347	-1.8	2.86982	4.62682	0.017
99.972	-1.9	427	14432	1168	56779	-1.9	3.06744	4.75419	0.02
99.962	-2	673	19372	1841	76151	-2	3.26505	4.88168	0.024
99.949	-2.1	1002	25266	2843	101417	-2.1	3.45378	5.00611	0.027
99.931	-2.2	1587	34221	4430	135638	-2.2	3.6464	5.13238	0.032
99.908	-2.3	2575	44707	7005	180345	-2.3	3.84541	5.2561	0.037
99.878	-2.4	4431	58006	11436	238351	-2.4	4.05827	5.37722	0.046
99.837	-2.5	7713	74491	19149	312842	-2.5	4.28215	5.49533	0.058
99.785	-2.6	13867	92331	33016	405173	-2.6	4.51872	5.60764	0.075
99.718	-2.7	24740	112091	57756	517264	-2.7	4.7616	5.71371	0.1
99.633	-2.8	42841	130328	100597	647592	-2.8	5.00259	5.8113	0.134
99.528	-2.9	70910	144686	171507	792278	-2.9	5.23428	5.89888	0.178
99.4	-3	111410	149370	282917	941648	-3	5.45166	5.97389	0.231
99.251	-3.1	166844	137185	449761	1078833	-3.1	5.65298	6.03295	0.294
99.082	-3.2	237690	106681	687451	1185514	-3.2	5.83724	6.07391	0.367
98.883	-3.3	326370	79438	1013821	1264952	-3.3	6.00596	6.10207	0.445
98.641	-3.4	433533	60375	1447354	1325327	-3.4	6.16057	6.12232	0.522
98.345	-3.5	559171	46194	2006525	1371521	-3.5	6.30244	6.1372	0.594
97.983	-3.6	704061	34483	2710586	1406004	-3.6	6.43306	6.14799	0.658
97.545	-3.7	867859	25532	3578445	1431536	-3.7	6.55369	6.1558	0.714
97.02	-3.8	1052514	17860	4630959	1449396	-3.8	6.66567	6.16119	0.762
96.399	-3.9	1256602	12009	5887561	1461405	-3.9	6.76994	6.16477	0.801
95.671	-4	1477461	7912	7365022	1469317	-4	6.86717	6.16712	0.834
94.824	-4.1	1723792	5079	9088814	1474396	-4.1	6.95851	6.16861	0.86
93.85	-4.2	1983673	3095	11072487	1477491	-4.2	7.04425	6.16952	0.882
92.741	-4.3	2261145	1533	13333632	1479024	-4.3	7.12495	6.16998	0.9
91.493	-4.4	2546468	606	15880100	1479630	-4.4	7.20085	6.17015	0.915
90.101	-4.5	2841179	201	18721279	1479831	-4.5	7.27234	6.17021	0.927
88.564	-4.6	3137199	60	21858478	1479891	-4.6	7.33962	6.17023	0.937
86.888	-4.7	3420203	4	25278681	1479895	-4.7	7.40275	6.17023	0.945
85.085	-4.8	3679224	0	28957905	1479895	-4.8	7.46177	6.17023	0.951
83.169	-4.9	3908870	0	32866775	1479895	-4.9	7.51676	6.17023	0.957
81.155	-5	4110622	0	36977397	1479895	-5	7.56794	6.17023	0.962
79.062	-5.1	4271716	0	41249113	1479895	-5.1	7.61541	6.17023	0.965
76.906	-5.2	4398604	0	45647717	1479895	-5.2	7.65942	6.17023	0.969
74.706	-5.3	4491102	0	50138819	1479895	-5.3	7.70017	6.17023	0.971
72.462	-5.4	4579164	0	54717983	1479895	-5.4	7.73813	6.17023	0.974
70.193	-5.5	4630291	0	59348274	1479895	-5.5	7.77341	6.17023	0.976
67.902	-5.6	4675309	0	64023583	1479895	-5.6	7.80634	6.17023	0.977
65.597	-5.7	4703339	0	68726922	1479895	-5.7	7.83713	6.17023	0.979
63.28	-5.8	4729273	0	73456195	1479895	-5.8	7.86603	6.17023	0.98
60.949	-5.9	4755936	0	78212131	1479895	-5.9	7.89327	6.17023	0.981
58.61	-6	4772816	0	82984947	1479895	-6	7.919	6.17023	0.982
56.277	-6.1	4762213	0	87747160	1479895	-6.1	7.94323	6.17023	0.983
53.934	-6.2	4781869	0	92529029	1479895	-6.2	7.96628	6.17023	0.984
51.595	-6.3	4772360	0	97301389	1479895	-6.3	7.98812	6.17023	0.985
49.275	-6.4	4735325	0	102036714	1479895	-6.4	8.00876	6.17023	0.986
46.957	-6.5	4729472	0	106766186	1479895	-6.5	8.02843	6.17023	0.986
44.654	-6.6	4699456	0	111465642	1479895	-6.6	8.04714	6.17023	0.987
42.391	-6.7	4619108	0	116084750	1479895	-6.7	8.06478	6.17023	0.987
40.145	-6.8	4582002	0	120666752	1479895	-6.8	8.08159	6.17023	0.988
37.924	-6.9	4534207	0	125200959	1479895	-6.9	8.09761	6.17023	0.988
35.734	-7	4468908	0	129669867	1479895	-7	8.11284	6.17023	0.989
33.564	-7.1	4427462	0	134097329	1479895	-7.1	8.12742	6.17023	0.989
31.43	-7.2	4356065	0	138453394	1479895	-7.2	8.1413	6.17023	0.989
29.345	-7.3	4255026	0	142708420	1479895	-7.3	8.15445	6.17023	0.99
27.301	-7.4	4169508	0	146877928	1479895	-7.4	8.16696	6.17023	0.99
25.313	-7.5	4057577	0	150935505	1479895	-7.5	8.17879	6.17023	0.99
23.382	-7.6	3940540	0	154876045	1479895	-7.6	8.18998	6.17023	0.991
21.524	-7.7	3791916	0	158667961	1479895	-7.7	8.20049	6.17023	0.991
19.739	-7.8	3642791	0	162310752	1479895	-7.8	8.21035	6.17023	0.991
18.027	-7.9	3493111	0	165803863	1479895	-7.9	8.21959	6.17023	0.991
16.387	-8	3347693	0	169151556	1479895	-8	8.22828	6.17023	0.991
14.822	-8.1	3193787	0	172345343	1479895	-8.1	8.2364	6.17023	0.991
13.344	-8.2	3015850	0	175361193	1479895	-8.2	8.24393	6.17023	0.992
11.954	-8.3	2835715	0	178196908	1479895	-8.3	8.2509	6.17023	0.992
10.651	-8.4	2660396	0	180857304	1479895	-8.4	8.25734	6.17023	0.992
9.439	-8.5	2473579	0	183330883	1479895	-8.5	8.26324	6.17023	0.992
8.314	-8.6	2294769	0	185625652	1479895	-8.6	8.26864	6.17023	0.992
7.277	-8.7	2115563	0	187741215	1479895	-8.7	8.27356	6.17023	0.992
6.332	-8.8	1930263	0	189671478	1479895	-8.8	8.278	6.17023	0.992
5.474	-8.9	1750974	0	191422452	1479895	-8.9	8.28199	6.17023	0.992
4.702	-9	1574540	0	192996992	1479895	-9	8.28555	6.17023	0.992
4.013	-9.1	1406744	0	194403736	1479895	-9.1	8.2887	6.17023	0.992
3.4	-9.2	1250740	0	195654476	1479895	-9.2	8.29149	6.17023	0.992
2.857	-9.3	1107404	0	196761880	1479895	-9.3	8.29394	6.17023	0.993
2.384	-9.4	964495	0	197726375	1479895	-9.4	8.29606	6.17023	0.993
1.977	-9.5	831487	0	198557862	1479895	-9.5	8.29789	6.17023	0.993
1.626	-9.6	716994	0	199274856	1479895	-9.6	8.29945	6.17023	0.993
1.328	-9.7	607926	0	199882782	1479895	-9.7	8.30078	6.17023	0.993
1.076	-9.8	514278	0	200397060	1479895	-9.8	8.30189	6.17023	0.993
0.864	-9.9	431281	0	200828341	1479895	-9.9	8.30283	6.17023	0.993
0.69	-10	355632	0	201183973	1479895	-10	8.30359	6.17023	0.993
0.548	-10.1	290426	0	201474399	1479895	-10.1	8.30422	6.17023	0.993
0.433	-10.2	234585	0	201708984	1479895	-10.2	8.30473	6.17023	0.993
0.341	-10.3	188210	0	201897194	1479895	-10.3	8.30513	6.17023	0.993
0.267	-10.4	150824	0	202048018	1479895	-10.4	8.30545	6.17023	0.993
0.211	-10.5	114553	0	202162571	1479895	-10.5	8.3057	6.17023	0.993
0.167	-10.6	89653	0	202252224	1479895	-10.6	8.30589	6.17023	0.993
0.133	-10.7	69592	0	202321816	1479895	-10.7	8.30604	6.17023	0.993
0.106	-10.8	53645	0	202375461	1479895	-10.8	8.30616	6.17023	0.993
0.085	-10.9	43593	0	202419054	1479895	-10.9	8.30625	6.17023	0.993
0.068	-11	35303	0	202454357	1479895	-11	8.30633	6.17023	0.993
0.054	-11.1	27161	0	202481518	1479895	-11.1	8.30639	6.17023	0.993
0.043	-11.2	22712	0	202504230	1479895	-11.2	8.30643	6.17023	0.993
0.034	-11.3	18360	0	202522590	1479895	-11.3	8.30647	6.17023	0.993
0.027	-11.4	14521	0	202537111	1479895	-11.4	8.3065	6.17023	0.993
0.021	-11.5	12195	0	202549306	1479895	-11.5	8.30653	6.17023	0.993
0.016	-11.6	10110	0	202559416	1479895	-11.6	8.30655	6.17023	0.993
0.012	-11.7	7909	0	202567325	1479895	-11.7	8.30657	6.17023	0.993
0.009	-11.8	6352	0	202573677	1479895	-11.8	8.30658	6.17023	0.993
0.007	-11.9	5000	0	202578677	1479895	-11.9	8.30659	6.17023	0.993
0.005	-12	3848	0	202582525	1479895	-12	8.3066	6.17023	0.993
0.003	-12.1	2802	0	202585327	1479895	-12.1	8.30661	6.17023	0.993
0.002	-12.2	2090	0	202587417	1479895	-12.2	8.30661	6.17023	0.993
0.002	-12.3	1588	0	202589005	1479895	-12.3	8.30662	6.17023	0.993
0.001	-12.4	1148	0	202590153	1479895	-12.4	8.30662	6.17023	0.993
0.001	-12.5	712	0	202590865	1479895	-12.5	8.30662	6.17023	0.993
0.001	-12.6	505	0	202591370	1479895	-12.6	8.30662	6.17023	0.993
0	-12.7	357	0	202591727	1479895	-12.7	8.30662	6.17023	0.993
0	-12.8	202	0	202591929	1479895	-12.8	8.30662	6.17023	0.993
0	-12.9	162	0	202592091	1479895	-12.9	8.30662	6.17023	0.993
0	-13	127	0	202592218	1479895	-13	8.30662	6.17023	0.993
0	-13.1	57	0	202592275	1479895	-13.1	8.30662	6.17023	0.993
0	-13.2	83	0	202592358	1479895	-13.2	8.30662	6.17023	0.993
0	-13.3	75	0	202592433	1479895	-13.3	8.30662	6.17023	0.993
0	-13.4	15	0	202592448	1479895	-13.4	8.30662	6.17023	0.993
0	-13.5	4	0	202592452	1479895	-13.5	8.30662	6.17023	0.993
0	-13.6	6	0	202592458	1479895	-13.6	8.30662	6.17023	0.993
